# Supplementary material for: Time to Relapse and Relapse Predictors in Patients with Schizophrenia at Ayder Comprehensive Specialized Hospital, Northern Ethiopia
Source: Hindawi journal article supplement (doi:10.1155/2023/6230063), 2023-05-11
Supplement: f1 [file 6230063.f1.docx]

0

1

2

3

4

Estimated cumulative hazard function

0

1

2

3

4

Cox-Snell residual

Nelson-Aalen cumulative hazard

Cox-Snell residual

Overall fit of cox proportional hazard model

(Supplementary figure): Overall Fit of Cox Proportional Hazard Model for schizophrenia patients at ACSH, Mekelle, Ethiopia. 2015- 2019 (n= 273).
